# Supplementary material for: Study on the fouling mechanism and cleaning method in the treatment of polymer flooding produced water with ion exchange membranes
Source: Royal Society of Chemistry journal article supplement (doi:10.1039/c8ra05575k), 2018-01-01
Supplement: c8ra05575k1.pdf [file c8ra05575k1.pdf]

## **Supplementary Information**

### **Study on Fouling Mechanism and Cleaning Method in the Treatment of Polymer Flooding Produced Water with Ion Exchange Membrane**

Qing Xia,<sup>a</sup> Haicheng Guo,<sup>b</sup> Yubing Ye,<sup>a</sup> Shuili Yu,<sup>a,\*</sup> Lei Li,<sup>a</sup> Qi Li<sup>a</sup> and Ruijun Zhang<sup>c</sup>

<sup>a</sup> State Key Laboratory of Pollution Control and Resource Reuse, School of Environmental Science and Engineering, Tongji University, Shanghai 200092, China

<sup>b</sup> Shanghai Municipal Engineering Design Institute (Group) Co., Ltd., Shanghai 200092, China

<sup>c</sup> Department of Chemical Engineering, KU Leuven, Celestijnenlaan 200F, B-3001 Heverlee, Belgium

□ Corresponding author. Tel/fax: +86 21 65982708.

E-mail address: ysl@tongji.edu.cn (S. Yu).

1. Properties of HPAM

Table S1 Properties of HPAM used in this study

| Parameters         | HPAM                                                                                                                                                                                                                                                                                                                                                                                                      |
|--------------------|-----------------------------------------------------------------------------------------------------------------------------------------------------------------------------------------------------------------------------------------------------------------------------------------------------------------------------------------------------------------------------------------------------------|
| Molecular weight   | 500000Da                                                                                                                                                                                                                                                                                                                                                                                                  |
| Chemical structure | $\left[ \begin{array}{c} \text{H}_2 \quad \text{H} \\   \quad   \\ \text{---C---C---} \\   \quad   \\ \text{O=C} \quad \text{O=C} \\   \quad   \\ \text{NH}_2 \quad \text{O}^- \end{array} \right]_m \left[ \begin{array}{c} \text{H}_2 \quad \text{H} \\   \quad   \\ \text{---C---C---} \\   \quad   \\ \text{O=C} \quad \text{O=C} \\   \quad   \\ \text{NH}_2 \quad \text{O}^- \end{array} \right]_n$ |
| Purity             | ≥99%                                                                                                                                                                                                                                                                                                                                                                                                      |
| Hydrolysis degree  | 35%                                                                                                                                                                                                                                                                                                                                                                                                       |

2. Measurement of zeta potentials

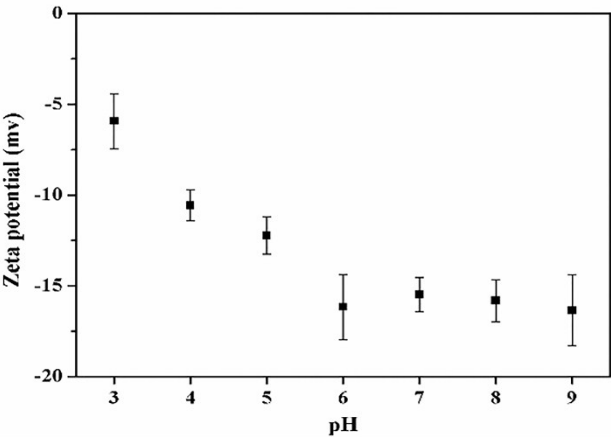

Fig. S1. Zeta potentials of HPAM under different pH values (in NaCl solution).

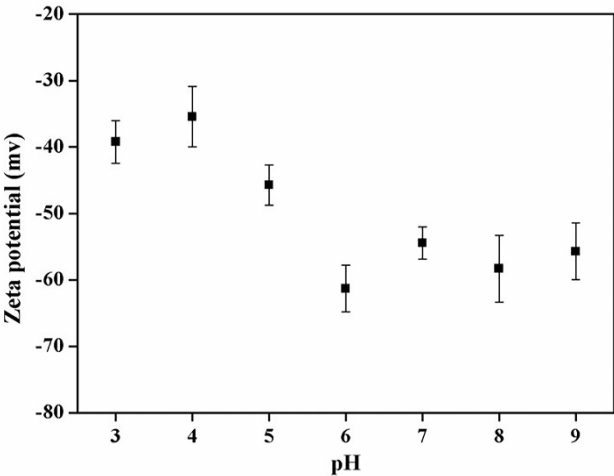

Fig. S2. Zeta potentials of oil emulsion under different pH values (in NaCl solution).

Zeta potentials of virgin and fouled AEMs were measured and the results were shown in table S2. The AEM was positively charged owing to the quaternary ammonium groups. The membranes turned to be negative after fouling and oil-HPAM-inorganic fouled membrane owned the strongest electronegativity, which could be explained by the negative foulants of HPAM and oil emulsion on the membrane.

**Table S2 Zeta potentials of membrane surface (pH=9)**

| AEM                 | Virgin    | HPAM fouled | HPAM-inorganic fouled | Oil-HPAM-inorganic fouled |
|---------------------|-----------|-------------|-----------------------|---------------------------|
| Zeta potential (mV) | 6.46±0.24 | -1.65±0.09  | -2.01±0.10            | -18.75±1.56               |

### 3. Adsorption experiment

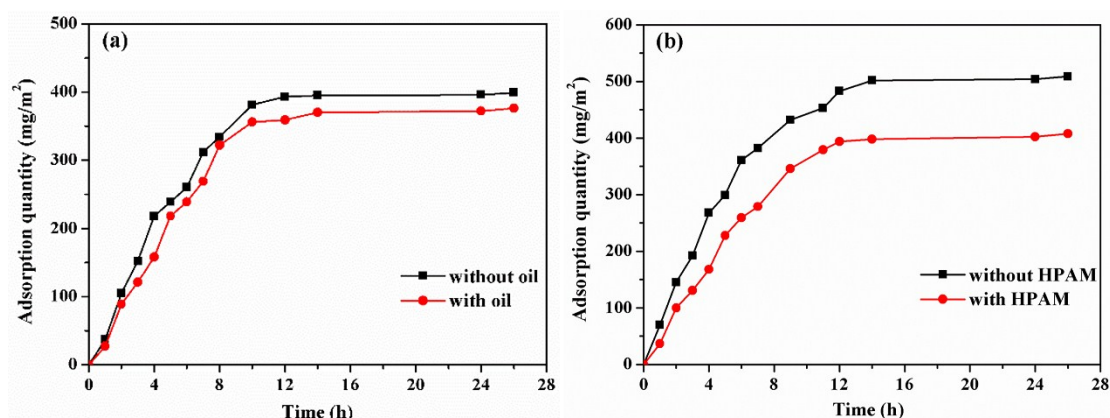

**Fig. S3.** Adsorption of the foulants: (a) HPAM; (b) oil emulsion in different solutions.

### 4. Scanning electron microscopy

As AEMs were fouled more seriously according to the results of membrane resistance, morphologies of AEMs before and after fouling in different feed solutions were analyzed by the scanning electron microscopy. SEM images of HPAM, HPAM-inorganic, oil-HPAM-inorganic fouled AEMs indicated that the membrane fouling aggravated with the increase of the complexity of the feed solutions, which was in accordance with the results of membrane resistance and desalination performance. We

could clearly observed that all AEMs were fouled compared with the virgin membrane and the membrane suffered the most serious fouling after ED experiment in oil-HPAM-inorganic solution, which was in accordance with the results of charge measurements (see Fig. S3). Chemical cleaning experiments were conducted to recover the membrane performance. Base cleaning, acid-base cleaning, and acid-base-SDBS cleaning were found to be the most effective cleaning methods for HPAM, HPAM-inorganic, and oil-HPAM-inorganic fouling, respectively. SEM images in Fig. S5 showed the cleaning effects by comparing the fouled membranes before and after cleaning.

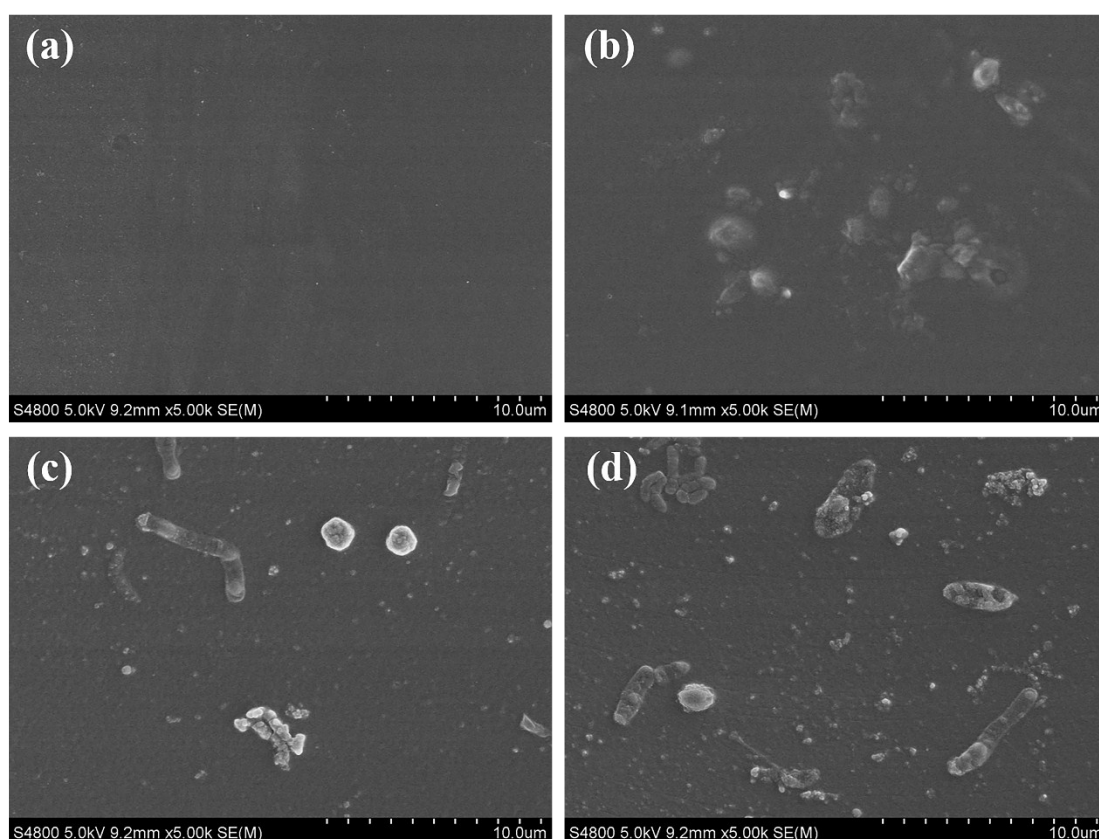

**Fig. S4.** SEM images of AEMs (a) without fouling; (b) fouled by HPAM; (c) fouled by HPAM-inorganic; (d) fouled by oil-HPAM-inorganic.

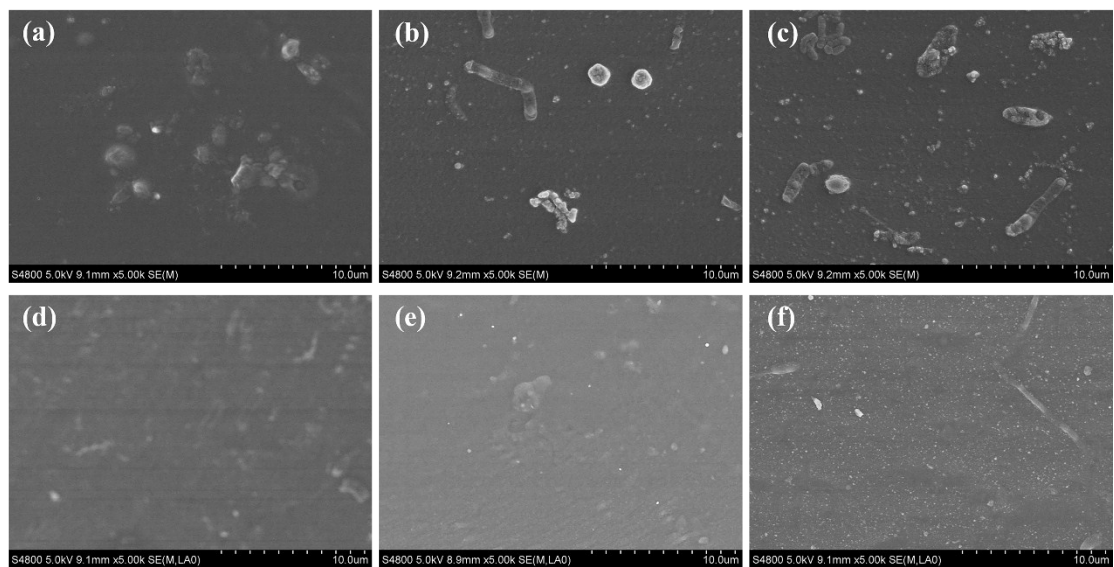

**Fig. S5.** SEM images of (a) AEM fouled by HPAM; (b) AEM fouled by HPAM-inorganic; (c) AEM fouled by oil-HPAM-inorganic; (d) HPAM-fouled AEM after base cleaning; (e) HPAM-inorganic-fouled AEM after acid-base cleaning; (f) oil-HPAM-inorganic-fouled AEM after acid-base-SDBS cleaning.
